# 3D quantification of changes in pancreatic islets in mouse models of diabetes type I and II

Urmas Roostalu<sup>1</sup>, Jacob Lercke Skytte<sup>1</sup>, Casper Gravesen Salinas<sup>1</sup>, Thomas Klein<sup>2</sup>, Niels Vrang<sup>1</sup>, Jacob Jelsing<sup>1</sup> and Jacob Hecksher-Sørensen<sup>1†</sup>

1: Gubra ApS, 2970 Hørsholm, Denmark

2: Department of Cardio-metabolic diseases. Boehringer Ingelheim Pharma GmbH & Co. KG

**Keywords:** Light sheet fluorescence microscopy, Tissue clearing, Beta cells, insulin, inflammation

## †Corresponding author:

Jacob Hecksher-Sørensen

Gubra ApS

Hørsholm, Denmark

Email: [jhs@gubra.dk](mailto:jhs@gubra.dk)

Ph. +45 29869407

## Abstract

Diabetes is characterized by rising levels in blood glucose and is often associated with a progressive loss of insulin producing beta cells. Recent studies have demonstrated that it is possible to regenerate new beta cells through proliferation of existing beta cells or trans-differentiation of other cell types into beta cells, raising hope that diabetes can be cured through restoration of functional beta cell mass. Efficient quantification of beta cell mass and islet characteristics is needed to enhance drug discovery for diabetes. Here we report a 3D quantitative imaging platform for unbiased evaluation of changes in islets in mouse models of type I and II diabetes. To determine if the method can detect pharmacologically induced changes in beta cell volume, mice were dosed for 14 days with either vehicle or the insulin receptor antagonist S961 (2.4 nmol/day) using osmotic minipumps. Mice dosed with S961 displayed increased blood glucose and insulin levels. Light sheet imaging of insulin and Ki67-immunostained pancreata revealed a 43% increase in beta cell volume and 21% increase in islet number. S961 treatment resulted in an increase of islets positive for cell proliferation marker Ki-67, suggesting that proliferation of existing beta cells underlies the expansion of total beta cell volume. Using light sheet imaging of non-obese diabetic (NOD) mouse model of type I diabetes we also characterized the infiltration of CD45-labelled leukocytes in islets. At 14 weeks 40% of small islet volume, but more than 80% of large islet show leukocyte infiltration. These results demonstrate how quantitative light sheet imaging can capture changes in individual islets to help pharmacological research in diabetes.

## Introduction

Diabetes is a life-threatening chronic disease that arises when the body is unable to regulate blood glucose homeostasis (Kitabchi et al., 2009). The hormone insulin has a central role in the regulation of blood glucose and the main causes leading to diabetes is either loss of insulin producing beta cells (Type 1 diabetes) or peripheral insulin resistance where beta cells fail to meet the required insulin demand (Type 2 diabetes). For almost a century hormone replacement therapy using insulin has been the preferred choice for treatment of diabetes (Joshi et al., 2007). However, in recent years there has been an increased focus on finding drugs or therapies that can either prevent the destruction of beta cells or restore functional beta cell mass and thereby cure the disease (Ben-Othman et al., 2017; Li et al., 2017; Zhou et al., 2008). Consequently, novel tools and models that can reliably detect changes in beta cell mass and health is highly warranted.

Stereology and optical projection tomography (OPT) have traditionally been considered the state of art methods to measure preclinical changes in beta cell mass in both 2D (Bock et al., 2003; Cucak et al., 2016; Dalbøge et al., 2013; Dalbøge et al., 2014; Hansen et al., 2014; Paulsen et al., 2010) and 3D (Alanentalo et al., 2007; Alanentalo et al., 2008). Although both methods provide similar results in beta cell mass, the 3D approach offer additional information regarding islet composition because it enables volumetric quantification of individual islets (Alanentalo et al., 2007). In models of Type 1 diabetes the immune cells infiltrate the islets and kills the insulin producing beta cells (Gianani and Eisenbarth, 2005). However, the progression of the disease is very heterogenous and the amount of infiltration can vary greatly between two neighbouring islets (Alanentalo et al., 2010; Mathews et al., 2015). Consequently, the ability to look at the whole pancreas in its entirety is important in order to fully understand the underlying pathology.

This study was aimed at developing imaging technologies for better understanding of diabetes and for more efficient drug discovery. 3D light sheet imaging and quantitative image analysis was used to characterize changes in beta cell volume and proliferation in an inducible mouse model of type II diabetes, relying on chronic insulin antagonist administration in obese mice. 3D imaging in NOD model was used to chart leukocyte infiltration in pancreata.

## Materials and Methods

### 2.1 Animals

Male C57Bl/6J mice were obtained from Janvier Labs (Le Genest-Saint-Isle, France), and were maintained in standard housing conditions (12 hours light/dark cycle and controlled temperature of 21-23°C). Mice had ad libitum access to tap water and 60% HFD diet (high fat Ssniff diet D12492, Brogaarden, Hørsholm, Denmark; 60% kcal% fat (91% lard, 9% soybean oil), 20% kcal% protein (98.5% casein, 1.5% L-cystine), 20% kcal% carbohydrates (63% Lodex-10, 37% sucrose)). Both groups were age-matched (30 weeks). When the mice reached a body weight around 50 g they were randomized into two groups according to body weight (n=7). Alzet osmotic minipumps (Cat no #1002, Alzet, Cupertino, USA) were implanted, containing either vehicle (PBS) or S961 peptide (Schafer-N, Copenhagen, Denmark) dissolved in PBS at a 0.4 nmol/ $\mu$ L concentration for 14 days. According to the manufacturer this corresponds to a daily release of 2.4 nmol/kg. NOD/ShiLtJ female mice were purchased from Charles River and maintained on regular chow (Altromin 1324, Brogaarden, Denmark) and were terminated at 14 weeks.

### 2.2 In vivo measurements

For blood glucose measurement blood samples were collected into heparinized glass capillary tubes and immediately suspended in glucose/lactate system solution buffer (EKF-diagnostics, Germany). Blood glucose was measured using a BIOSEN c-Line glucose meter (EKF-diagnostics, Germany) according to the manufacturer's instructions. For insulin measurement blood samples were similarly collected in heparinized tubes and plasma was separated and stored at -80°C until analysis. Mouse insulin was measured using the MSD platform (Meso Scale Diagnostics).

### 2.3 Sample preparation for immunohistochemistry

Animals were transcardially perfused with heparinized PBS and 40 ml of 10% neutral buffered formalin (CellPath, Newtown, UK) under Hypnorm-Dormicum (fentanyl 788  $\mu$ g/kg, fluanisone 25 mg/kg and midazolam 12.5 mg/kg, subcutaneous injection) anaesthesia. Pancreata were carefully dissected and immersion-fixed in 10% neutral buffered formalin overnight at room temperature on a horizontal shaker. The samples were washed 3 $\times$ 30 minutes in PBS with shaking and dehydrated at room temperature in methanol/H<sub>2</sub>O gradient to 100% methanol (20%, 40%, 60%, 80%, 100% methanol, each step 1 hour). The pancreata

were stored in 100% methanol (VWR International A/S, Søborg, Denmark) at 4°C until further processing.

#### *2.4 Whole-pancreas immunohistochemistry for labelling of insulin and Ki67*

For whole-pancreas immunohistochemistry, a modified version of the original iDISCO (immunolabeling-enabled three-dimensional imaging of solvent-cleared organs) protocol was used (Renier et al., 2014; Renier et al., 2016). Samples were washed with 100% methanol for 1 hour and incubated overnight in 66% dichloromethane/33% methanol (VWR International A/S, Søborg, Denmark) at room temperature. Then, samples were washed twice in 100% methanol for 30 minutes and bleached in chilled fresh 5% H<sub>2</sub>O<sub>2</sub> (Acros Organics, Fisher Scientific Biotech Line A/S, Slangerup, Denmark) in methanol overnight at 4°C. Subsequently, the samples were rehydrated in methanol/PBS series (80%, 60%, 40%, 20% methanol with 0.2% Triton X-100 (Merck, Darmstadt, Germany), each step 1 hour) at room temperature, washed in PBS with 0.2% Triton X-100 twice for 1 hour at room temperature and in permeabilization solution (PBS with 0.2% Triton X-100, supplemented with 20% volume of DMSO (Merck, Darmstadt, Germany) and 2.3% weight/volume glycine (Merck, Darmstadt, Germany)) for 3 days at 37°C. Unspecific antibody binding was blocked by 2 day incubation in blocking solution (PBS, 2% TritonX-100, 10% DMSO/6% donkey serum (Jackson ImmunoResearch, Cambridgeshire, UK). Immunohistochemistry was carried out sequentially, by first incubating the samples for 7 days at 37°C with anti-Ki67 antibody (1:200 dilution, NB110-89717, Centennial, CO, USA) or with anti-CD45 (1:200 dilution, 550539 BD Pharmingen, CA, USA), diluted in PTwH, 5% DMSO, 3% donkey serum, 0.2% of 10% NaN<sub>3</sub> (Merck, Darmstadt, Germany). Following incubation with primary antibody, the samples were washed in PTwH (PBS, 0.2% Tween 20 (Merck, Darmstadt, Germany), 0.1% of 10 mg/ml heparin solution) for 1×10 minutes, 1×20 minutes, 1×30 minutes, 1×1 hour, 1× 2 hours and 1× 2 days. Subsequently, the pancreata were incubated in secondary antibody solution (PTwH, 3% donkey serum, 0.2% of 10% NaN<sub>3</sub>) for 7 days at 37°C with Alexa Fluor 790 AffiniPure Donkey Anti-Rabbit IgG (1:1000 dilution, cat no # 711-655-152, Jackson ImmunoResearch, Cambridgeshire, UK) or Anti-Rat-Cy3 IgG (1:1000 dilution, cat no # 712-165-153, Jackson ImmunoResearch, Cambridgeshire, UK) and washed in PTwH for 1×10 minutes, 1×20 minutes, 1×30 minutes, 1×1 hour, 1× 2 hours and 1× 3 days. Samples were post-fixed in 10% NBF overnight and incubated in Alexa Fluor 647 conjugated anti-insulin antibody (1:500 dilution, cat no # 9008, Cell Signaling Technology, Danvers, MA, USA) in the above described antibody dilution buffer. The samples were subsequently

washed again in PTwH for 1×10 minutes, 1×20 minutes, 1×30 minutes, 1×1 hour, 1× 2 hours and 1× 3 days and embedded in 1% low melting point agarose (Thermo Fisher, cat#16520050, dissolved in PBS). The agarose-embedded pancreata were dehydrated in increasing concentrations of methanol (20%, 40%, 60%, 80%, 100%; 1h each at room temperature), followed by overnight incubation in 100% methanol. Samples were next incubated in 66% dichloromethane/33% methanol for 3 hours at room temperature with shaking and in 100% dichloromethane twice for 15 minutes with shaking to remove traces of methanol. Finally, the samples were transferred to dibenzyl ether (Merck, Darmstadt, Germany) and stored in closed glass vials until imaged with light sheet fluorescence microscope.

### *2.5 Light sheet fluorescence microscopy of cleared immunolabelled pancreata*

All agarose embedded pancreata were imaged on a LaVision ultramicroscope II setup (Miltenyi Biotec, Bergisch Gladbach, Germany) equipped with a Zyla 4.2P-CL10 sCMOS camera (Andor Technology, Belfast, UK), SuperK EXTREME supercontinuum white-light laser EXR-15 (NKT photonics, Birkerød, Denmark) and MV PLAPO 2XC (Olympus, Tokyo, Japan) objective lens. The samples were attached to the sample holder with neutral silicone and imaged in a chamber filled with dibenzyl ether. Version 7 of the Inspector microscope controller software was used. Images were acquired at 0,63 x magnification (1.2 × total magnification) with an exposure time of 266 ms for insulin and 1 s for Ki67 in a z-stack at 10 µm intervals. Acquired volumes (16-bit tiff) had an in-plane resolution of 4,8 µm and z-resolution of 3,78 µm (NA=0.156). High numerical aperture is needed to capture individual Ki67+ cell nuclei, however, results in uneven light sheet thickness. To alleviate the effect of this, horizontal focusing was captured in 9 planes with contrast-based blending of the images.

### *2.6 Image processing for insulin and CD45 segmentation*

U-net network architecture (Ronneberger et al., 2015) was used to create a 2D U-Net with four repeated layers for encoding and four repeated layers for decoding, implemented in Python utilizing the Keras machine learning library (<https://github.com/keras-team/keras>). The U-Net input was a single intensity channel and the output was a single label image. Raw images were down sampled by a factor of 2 to a size of 1024×1024 pixels. Annotations were performed manually on a total of 154 image tiles with a size of 512×512 pixels. Intensities of the training images were rescaled between 0 and 1. 75% of the data were used for training, 20% for validation and 5% for testing. Data augmentation, in the form of skews, rotations,

flips, zoom and random distortions was applied during training with probability of 30% for each operation. Training was performed for 350 epochs and the model achieved a dice coefficient of 0.79 on the validation set. The trained model was afterwards used to segment full-size 2048×2048 pixel images.

### *2.7 Quantification of Ki67 positive cells*

Background subtraction through morphological opening using a disk element was performed slice-by-slice on raw Ki-67 intensity images. To identify Ki-67 positive cell candidates, local intensity peaks were located by moving a filter cube (5-by-5-by-3 (x,y,z) voxels) over the image volume. The coordinates of detected local intensity peak candidates were used as seeds in a watershed segmentation with a background intensity cut-off at 50 and the resulting segmentations were filtered by removing cell segmentation regions smaller than 4 voxels and bigger than 100 voxels.

### *2.8 Statistics*

Pairwise treatment effects were investigated using unpaired t-tests or Hotelling's T-squared test. Additionally, in multiple cases, the treatment effect was investigated specifically for different islet size categories. This required binning the data into four different size categories. As the binning were splits of the full data set, this introduced a correlated factor to the analysis. Thereby, data was analyzed as a two-way 2x4 (2 treatments, 4 size categories) mixed ANOVA, with the treatment as a between-subjects factor and the size category as a within-subjects factor. For all mixed ANOVA analysis, the Greenhouse-Geisser correction was used for p-values related to the within-subjects factor, if Mauchly's test of sphericity indicated that the assumption of sphericity was violated. All statistics were carried out using R (*RStudio Team (2020). RStudio: Integrated Development for R. RStudio, PBC, Boston, MA*) and statistical results are commonly presented alongside mean ± SEM (standard error of mean).

## Results

### 3.1 Pipeline for 3D imaging of beta cell volume and proliferation in entire pancreata

Fast volumetric analysis of changes in islet morphology and molecular characteristics in an entire pancreas would enable more efficient preclinical pharmacological research. Here we set out to establish a LSFM 3D imaging platform with sufficient sensitivity to detect changes in beta cell volume in a mouse model of diabetes, focusing first on type II diabetes. For this purpose, mice were dosed for two weeks with either vehicle or the insulin receptor antagonist S961 (Figure 1A). During the *in vivo* phase blood glucose and plasma insulin levels were measured at day 6 and day 13 and an oral glucose tolerance test (OGTT) was performed at day 13. At day 14 the mice were terminated and the pancreata removed and immunolabelled with antibodies against insulin and Ki67 using a modified version of iDISCO+ (Renier et al., 2014). Prior to clearing the whole pancreas was embedded in low melting-point agarose using the chamber of a 10 mL syringe, where the tip had been removed, as mould. The resulting agarose block that was cleared in DBE had a diameter of approximately 12 mm, which allows the entire pancreas to be scanned in one tile. This minimized overall scanning time and enabled to maintain the same imaging settings for all samples (i.e. position in laser lines), but as a result the morphological features, such as head and tail, could no longer be distinguished from each other. The scanned images were processed for image analysis using the insulin channel to segment individual islets (Supl Movie 1). This segmentation was subsequently used to quantify total beta cell volume, the total number of insulin positive islets and the total number of Ki67 positive beta cells (Fig 1B; Supl Movie 2).

### 3.2 S961 dosing leads to impaired glucose handling

The insulin receptor antagonist S961 is a single chain peptide of 43 amino acids that binds with high affinity to the insulin receptor, but without activating it (Schäffer et al., 2008). Blocking of insulin receptor signalling using S961 has previously been shown to rapidly induce proliferation of existing beta cells (Dumayne et al., 2020; Jiao et al., 2014; Yi et al., 2013). Throughout the study, all mice had free access to high calorie food and the two groups consumed the same amount of food (Fig. 2A). Due to the surgery required for implantation of the minipumps a small decrease in body weight was observed in both groups. However, the weight loss was more pronounced in the S961 group (Fig. 2B), corresponding to the catabolic phenotype expected from impaired insulin signalling. After 13 days of treatment the mice were subjected to an OGTT (Fig. 2C). At all points measured the S961 dosed mice displayed significantly higher blood glucose levels and the return to baseline was delayed. Similarly,



both plasma insulin levels and fasting blood glucose were markedly increased in the S961-dosed mice at both day 6 and day 13 (data not shown; Fig. 2D and E). At termination, the whole pancreas was removed and weighed. No changes in pancreas weight was observed between the two groups (Fig. 2F). Taken together, all these observations indicate that S961 effectively blocked insulin signalling, leading to a diabetic phenotype.

### *3.3 Increased beta cell volume in S961 dosed mice*

In order to determine the effect of the metabolic changes on beta cell volume the pancreata from all mice were immunolabelled with antibodies against insulin and cell proliferation marker Ki67 using a modified iDISCO protocol (Renier et al., 2014). The insulin segmented signal (Fig. 3A) also allowed for quantification of the total number of insulin positive islets and beta cell volume in each pancreas. Low size cut-off at size at  $25 \times 1000 \mu\text{m}^3$  for islets was implemented to avoid false-positive signal that may result for example from non-specific presence of fluorophore in the tissue (from fluorophore-conjugated secondary antibody). In the vehicle dosed mice, we found that the mean number of insulin positive islets amounted to  $7962 \pm 241$  while it was  $9631 \pm 346$  in the S961 group, corresponding to a 21% increase (Fig. 3B). Similarly, the mean beta cell volume in the vehicle group pancreas is  $2.95 \text{ mm}^3 \pm 0.15$  and  $4.23 \text{ mm}^3 \pm 0.28$  in the S961 group, corresponding to a 43% increase (Fig. 3C-D). Hence, S961 treatment results in significant ( $p \leq 0.001$ ) increase in both islet count and volume.

### *3.4 Islets of all sizes are affected by S961 dosing*

Since there is considerable interest in defining the heterogeneity of islets and the response of different size islets to diabetes and drug treatment (Aizawa et al., 2001; Baetens et al., 1979; Lehmann et al., 2007; Saito et al., 1978), we allocated the segmented islets into four size bins: small (yellow;  $25\text{-}170 \times 1000 \mu\text{m}^3$ ), medium (cyan;  $170\text{-}1100 \times 1000 \mu\text{m}^3$ ), large (magenta;  $1100\text{-}7500 \times 1000 \mu\text{m}^3$ ) and very large (red;  $7500\text{-}50000 \times 1000 \mu\text{m}^3$ ) and charted the location of these categories in all pancreata (Fig. 3C; Supplementary Fig. 1). When looking at the accumulated beta cell volume as a function of individual insulin positive islet size it is evident that there is a continuous increase in the total beta cell volume following S961 dosing across islet size categories (Fig. 4A-B).

To characterize the changes in more detail we looked at the islet size categories separately (Figure 4C). In the small insulin positive islets category, our analysis counted  $3318 \pm 141$  islets in the vehicle group and  $3614 \pm 102$  in the S961 group, which corresponds to 8.9%

increase. For the medium sized islets category, the numbers were  $2300 \pm 99$  in the vehicle group and  $3458 \pm 299$  in the S961 group, representing a 50.3% increase ( $p \leq 0.05$ ). In the large sized islets category, there were  $456 \pm 28$  in the vehicle group and  $621 \pm 36$  in the S961 group, corresponding to 36.1% increase. In the very large islets category, there were  $45 \pm 5$  in the vehicle dosed group and  $68 \pm 9$  in the S961 group, corresponding to a 51.1% increase. Statistical analysis of the islet count data revealed significant main effects of both treatment ( $F(1,12) = 18.37$ ,  $p = 0.0011$ ), and the size category, ( $F(3,36) = 356.93$ ,  $p < 0.001$ ), and their two-way interaction was also found significant ( $F(3,36) = 8.16$ ,  $p = 0.0045$ ).

Next, we examined the effect on S961 on beta cell volume in the different size bins (Fig. 4D). In the small islet category, the beta cell volume was  $0.26 \pm 0.01 \text{ mm}^3$  in the vehicle group and  $0.3 \pm 0.01 \text{ mm}^3$  in the S961 group, representing a 15.3% increase. For the medium sized islets, we detected a 50.5% increase in beta cell volume ( $p \leq 0.05$ ), from  $0.93 \pm 0.05 \text{ mm}^3$  to  $1.4 \pm 0.1 \text{ mm}^3$ . For the large islets, the beta cell volume increased from  $1.19 \pm 0.07 \text{ mm}^3$  to  $1.6 \pm 0.09 \text{ mm}^3$ , which corresponds to 34.4%. Finally, the very large islets increased from  $0.55 \pm 0.07 \text{ mm}^3$  to  $0.9 \pm 0.15 \text{ mm}^3$ , which corresponds to a 97.8% increase. For the islet volume data, statistical analysis revealed significant main effects of both treatment ( $F(1,12) = 15.87$ ,  $p = 0.0018$ ) and the size category ( $F(3,36) = 86.28$ ,  $p < 0.001$ ), but no significant two-way interaction was found ( $F(3,36) = 3.39$ ,  $p = 0.0513$ ). As the islet count data and the beta cell volume data are correlated measures, pairwise post hoc tests on the treatment effect within each size category, were carried out in multivariate manner using Hotelling's T-squared test. The pairwise tests showed significant treatment effect for small ( $p = 0.0233$ ), medium ( $p = 0.0094$ ), and large islets ( $p = 0.0121$ ), but not for very large islets ( $p = 0.1694$ ).

### *3.5 Proliferation of beta cells is the most likely explanation for increased beta cell volume in response to S961 dosing*

By staining pancreata for Ki67 we set out to quantify the number of proliferating beta cells. Light sheet microscopy enabled the identification of individual proliferating cells within 3D imaged pancreata (Figure 5A-B). Using the insulin staining to segment the beta cell volume we could quantify Ki67 positive nuclei within this volume. The analysis illustrates significant increase in the total number of Ki67 positive islets and in the total number of proliferating cells within the beta cell volume across pancreata in the S961 group in comparison to the

vehicle group (Figures 5C-D). Quantification of Ki-67 signal by islet size categories demonstrates that there was an increase in proliferation among islets of all analysed sizes, albeit with variation between samples (Figure 5E). In statistical analysis of the number of Ki67 positive islets, significant effects were found for both treatment ( $F(1,12) = 10.92$ ,  $p = 0.0063$ ) and the size category ( $F(3,36) = 180.62$ ,  $p < 0.001$ ). No significant two-way interaction was observed ( $F(3,36) = 1.03$ ,  $p = 0.3590$ ).

Unpaired t-test tests were performed on the treatment effect within each size category, which found a significant within all size categories; small ( $p = 0.0129$ ), medium ( $p = 0.0072$ ), large ( $p = 0.0189$ ), very large ( $p = 0.0051$ ).

### *3.6 Light sheet imaging enables to identify early signs of Type I diabetes in mouse*

Female NOD mice develop hyperglycemia around 14 weeks of age (males a few weeks later) (Mathews et al., 2015). The onset is variable and already at 5 weeks immune cell infiltrates can be detected (DiLorenzo et al., 1998). We reasoned that 3D light sheet imaging can capture the inflammatory changes in pre-diabetic NOD mice and thus analyzed pancreata from 14-week-old female mice. At the time of termination blood glucose was normal (data not shown). The dissected pancreata were stained for insulin and general leukocyte marker CD45 (Figure 6A; Supl Movie 3). Light sheet microscopy enables visualization of leukocytes across pancreata, although in highly inflamed areas individual cells could not be distinguished as CD45 antigen protein tyrosine phosphatase receptor type C is a membrane protein (Figure A-B). Using the islet segmentation platform as described above we identified insulin-labelled islets, classified these into size categories and quantified CD45 staining within these as a fraction of total islet volume (Figure 6C). 5% volume threshold (CD45 signal from total islet volume) was implemented to define an inflamed islet. 42.1% ( $\pm 11.7$ ) of islets in the small islet size category, 68.8% ( $\pm 13.7$ ) in the medium-sized islets category, 85% ( $\pm 6.4$ ) in the large-sized islets category and 100% in the very large islets category were positive for CD45 signal. These data demonstrate extensive islet infiltration in NOD mice at the onset of diabetes, whereby large majority of medium to large sized islets are already inflamed.

## **Discussion**

The aim of this study was to demonstrate a method for accurate measurement of islet beta cell volume, proliferation and inflammation in mice using light-sheet microscopy and automated 3D image analysis. In particular, 3D imaging of entire pancreata enables to reveal the

changes in different islet size categories. Using the here developed methods we show that in a mouse model of S961-induced hyperglycaemia and impaired insulin sensitivity there is an overall increase in beta cell volume and islet number. In NOD mouse model of type I diabetes we show that prior to the onset of hyperglycaemia more than 80% of large islets are already infiltrated by leukocytes.

A particular strength of 3D light sheet imaging is the capacity to carry out volumetric analysis of islets in different size categories and characterize various parameters within these. Heterogeneity of islets and functional differences of small and large islets are well established (Aizawa et al., 2001; Baetens et al., 1979; Huang et al., 2011; Roscioni et al., 2016). It is for example conceivable that different sources of beta cell regeneration may impact islet size distribution differently and accurate analysis of the process is needed for preclinical drug efficacy studies. Neogenesis or trans-differentiation may increase the primarily the number and volume of small islets more than large islets, while general beta cell proliferation may result in a more uniform response across size categories.

To study the response to acquired impairment in insulin sensitivity we used insulin receptor antagonist S961. Chronic dosing in male high fat diet-induced obese mice resulted in increased levels of insulin and blood glucose, indicating that the S961 dose chosen was sufficient to drive a sustained physiological response. 3D image analysis demonstrated overall increase in beta cell volume and in islet count. Analysis of the response in islet size categories showed an increase in both the number and volume of small, medium and large sized islets in the S961 treated group. The number of islets and their mean volume is well known to depend on disease phase in patients with type II diabetes. An early compensatory hypertrophy of islets is later followed by beta cell loss (Chen et al., 2017). In support of this, the presented Ki67 analysis showed an overall increased labelling in the S961 group, suggesting higher beta cell proliferation. This corresponds to previous studies showing that beta cell proliferation is the main factor driving the expansion of beta cell volume in response to S961 dosing (Dumayne et al., 2020; Jiao et al., 2014; Yi et al., 2013). Similarly, increased islet number in S961 treated mice has also been observed by other (González-Mariscal et al., 2018; Okamoto et al., 2017). However, these results do not rule out alternative mechanisms resulting in increased beta cell count and volume. These include trans-differentiation of other cell types into beta cells and islet neogenesis. Both other islet cell types (Ben-Othman et al., 2017; Cigliola et al., 2018; Li et al., 2017; Zhou et al., 2008) as well as ductal epithelium

(Bonner-Weir et al., 2012) may contribute to insulin producing cells. More detailed analysis of different cell types in early phases of S961 treatment may provide clues into biological process in early type II diabetes.

Type I diabetes results from autoimmune destruction of beta cells. NOD mouse model has provided valuable insights into the disease progression, but direct translation to new therapeutics has been challenging (Pearson et al., 2016; Reed and Herold, 2015; Sandor et al., 2019). High variability, both in NOD mice and in patients and still inadequately understood mechanisms of the immune response have hindered pharmacological advances. Here we established light sheet imaging platform to characterize immune cell infiltration in islets in the NOD model. We show that already before any changes in blood glucose can be detected, 80% of large islets and 40% of small islets are infiltrated by CD45+ immune cells. Previous intravital imaging studies, using fluorescently labelled immune cell subsets have established the early onset of the disease at 3-5 weeks of age, whereby stochastic homing and infiltration of islets occurs at first by individual infiltration of autoreactive T-cells (Coppieters et al., 2012; Lindsay et al., 2015; Mohan et al., 2017). This early infiltration occurs significantly prior to the development of hyperglycaemia at 14 weeks (Mathews et al., 2015). After the initial infiltration of the islets they are targeted by multiple leukocyte subtypes from the islet periphery (Mohan et al., 2017). In support of this we found accumulation of leukocytes in islet periphery at 14 weeks. The light sheet imaging platform demonstrated in the present study that does not rely on transgenic reporters or *in vitro* cell labelling and is particularly amenable to pharmacological research in type I diabetes. Additional antibodies for immune cell subsets can be included, enabling to define changes in the immune cell repertoire.

In conclusion, we demonstrate here a 3D imaging platform for analysis of changes in entire pancreata in mouse models of type I and II diabetes. We show that insulin receptor antagonist S961 leads to increased islet number and volume, likely due to proliferative response within beta cells. In the NOD mouse model of type I diabetes we found that prior to the onset of hyperglycaemia the vast majority of islets show already significant leukocyte infiltration. The established methodology can be adjusted to incorporate additional markers of interest (i.e. activated cell signalling pathways, leukocyte subsets, drug target receptors) for gaining better understanding of the basic biological mechanisms of the diseases and for pharmacological analysis of the efficacy of therapeutics.

## **Declarations**

**Conflicts of Interest:** Urmas Roostalu, Casper Gravesen Salinas, Jacob Lercke Skytte and Jacob Hecksher-Sørensen are currently employed by Gubra ApS. Niels Vrang and Jacob Jelsing are the owners of Gubra ApS. Thomas Klein is employed by Boehringer Ingelheim.

**Ethics approval:** All animal procedures were conducted in compliance with internationally accepted principles for the care and use of laboratory animals and were approved by the Danish Animal Experiments Inspectorate (license #2013-15-2934-00784).

**Code availability:** Source code used for generating the insulin segmentation is accessible at <https://github.com/Gubra-ApS>.

**Acknowledgements:** The authors would like to acknowledge Lotte Ankjær Frederiksen and Hanne Duus Laustsen for skilful technical assistance.

## References

- Aizawa, T., Kaneko, T., Yamauchi, K., Yajima, H., Nishizawa, T., Yada, T., Matsukawa, H., Nagai, M., Yamada, S., Sato, Y., et al.** (2001). Size-related and size-unrelated functional heterogeneity among pancreatic islets. *Life Sci.*
- Alanentalo, T., Asayesh, A., Morrison, H., Lorén, C. E., Holmberg, D., Sharpe, J. and Ahlgren, U.** (2007). Tomographic molecular imaging and 3D quantification within adult mouse organs. *Nat. Methods.*
- Alanentalo, T., Lorén, C. E., Larefalk, Å., Sharpe, J., Holmberg, D. and Ahlgren, U.** (2008). High-resolution three-dimensional imaging of islet-infiltrate interactions based on optical projection tomography assessments of the intact adult mouse pancreas. *J. Biomed. Opt.*
- Alanentalo, T., Hörnblad, A., Mayans, S., Nilsson, A. K., Sharpe, J., Larefalk, Å., Ahlgren, U. and Holmberg, D.** (2010). Quantification and three-dimensional imaging of the insulinitis-induced destruction of  $\beta$ -cells in murine type 1 diabetes. *Diabetes.*
- Baetens, D., Malaisse-Lagae, F., Perrelet, A. and Orci, L.** (1979). Endocrine pancreas: Three-dimensional reconstruction shows two types of islets of Langerhans. *Science* (80-).
- Ben-Othman, N., Vieira, A., Courtney, M., Record, F., Gjernes, E., Avolio, F., Hadzic, B., Druelle, N., Napolitano, T., Navarro-Sanz, S., et al.** (2017). Long-Term GABA Administration Induces Alpha Cell-Mediated Beta-like Cell Neogenesis. *Cell.*
- Bock, T., Pakkenberg, B. and Buschard, K.** (2003). Increased islet volume but unchanged islet number in ob/ob mice. *Diabetes.*
- Bonner-Weir, S., Guo, L., Li, W. C., Ouziel-Yahalom, L., Lysy, P. A., Weir, G. C. and Sharma, A.** (2012). Islet neogenesis: A possible pathway for beta-cell replenishment. *Rev. Diabet. Stud.*
- Chen, C., Cohrs, C. M., Stertmann, J., Bozsak, R. and Speier, S.** (2017). Human beta cell mass and function in diabetes: Recent advances in knowledge and technologies to understand disease pathogenesis. *Mol. Metab.* **6**, 943–957.
- Cigliola, V., Ghila, L., Thorel, F., van Gurp, L., Baronnier, D., Oropeza, D., Gupta, S., Miyatsuka, T., Kaneto, H., Magnuson, M. A., et al.** (2018). Pancreatic islet-autonomous insulin and smoothed-mediated signalling modulate identity changes of glucagon +  $\alpha$ -cells. *Nat. Cell Biol.* **20**, 1267–1277.



- Coppieters, K., Amirian, N. and Von Herrath, M.** (2012). Intravital imaging of CTLs killing islet cells in diabetic mice. *J. Clin. Invest.* **122**, 119–131.
- Cucak, H., Hansen, G., Vrang, N., Skarsfeldt, T., Steiness, E. and Jelsing, J.** (2016). The IL-1  $\beta$  Receptor Antagonist SER140 Postpones the Onset of Diabetes in Female Nonobese Diabetic Mice. *J. Diabetes Res.*
- Dalbøge, L. S., Almholt, D. L. C., Neerup, T. S. R., Vassiliadis, E., Vrang, N., Pedersen, L., Fosgerau, K. and Jelsing, J.** (2013). Characterisation of age-dependent beta cell dynamics in the male db/db mice. *PLoS One.*
- Dalbøge, L. S., Almholt, D. L. C., Neerup, T. S. R., Vrang, N., Jelsing, J. and Fosgerau, K.** (2014). The novel GLP-1-gastrin dual agonist ZP3022 improves glucose homeostasis and increases  $\beta$ -cell mass without affecting islet number in db/db mice. *J. Pharmacol. Exp. Ther.*
- DiLorenzo, T. P., Graser, R. T., Ono, T., Christianson, G. J., Chapman, H. D., Roopenian, D. C., Nathenson, S. G. and Serreze, D. V.** (1998). Major histocompatibility complex class I-restricted T cells are required for all but the end stages of diabetes development in nonobese diabetic mice and use a prevalent T cell receptor chain gene rearrangement. *Proc. Natl. Acad. Sci.* **95**, 12538–12543.
- Dumayne, C., Tarussio, D., Sanchez-Archidona, A. R., Picard, A., Basco, D., Berney, X. P., Ibberson, M. and Thorens, B.** (2020). Klf6 protects  $\beta$ -cells against insulin resistance-induced dedifferentiation. *Mol. Metab.*
- Gianani, R. and Eisenbarth, G. S.** (2005). The stages of type 1A diabetes: 2005. *Immunol. Rev.*
- González-Mariscal, I., Montoro, R. A., Doyle, M. E., Liu, Q. R., Rouse, M., O’Connell, J. F., Santa-Cruz Calvo, S., Krzysik-Walker, S. M., Ghosh, S., Carlson, O. D., et al.** (2018). Absence of cannabinoid 1 receptor in beta cells protects against high-fat/high-sugar diet-induced beta cell dysfunction and inflammation in murine islets. *Diabetologia* **61**, 1470–1483.
- Hansen, H. H., Jelsing, J., Hansen, C. F., Hansen, G., Vrang, N., Mark, M., Klein, T. and Mayoux, E.** (2014). The sodium glucose cotransporter type 2 inhibitor empagliflozin preserves  $\beta$ -cell mass and restores glucose homeostasis in the male Zucker diabetic fatty rat. *J. Pharmacol. Exp. Ther.*



- Huang, H. H., Novikova, L., Williams, S. J., Smirnova, I. V. and Stehno-Bittel, L.** (2011). Low insulin content of large islet population is present in situ and in isolated islets. *Islets*.
- Jiao, Y., Le Lay, J., Yu, M., Naji, A. and Kaestner, K. H.** (2014). Elevated mouse hepatic betatrophin expression does not increase human  $\beta$ -Cell replication in the transplant setting. *Diabetes*.
- Joshi, S. R., Parikh, R. M. and Das, A. K.** (2007). Insulin--history, biochemistry, physiology and pharmacology. *J. Assoc. Physicians India*.
- Kitabchi, A. E., Umpierrez, G. E., Miles, J. M. and Fisher, J. N.** (2009). Hyperglycemic crises in adult patients with diabetes. In *Diabetes Care*, .
- Lehmann, R., Zuellig, R. A., Kugelmeier, P., Baenninger, P. B., Moritz, W., Perren, A., Clavien, P. A., Weber, M. and Spinaz, G. A.** (2007). Superiority of small islets in human islet transplantation. *Diabetes*.
- Li, J., Casteels, T., Frogne, T., Collombat, P., Hecksher-sørensen, J. and Kubicek, S.** (2017). Artemisinin Target GABA(A) Receptor Signaling and Impair alpha Cell Identity. *Cell*.
- Lindsay, R. S., Corbin, K., Mahne, A., Levitt, B. E., Gebert, M. J., Wigton, E. J., Bradley, B. J., Haskins, K., Jacobelli, J., Tang, Q., et al.** (2015). Antigen Recognition in the Islets Changes with Progression of Autoimmune Islet Infiltration. *J. Immunol.* **194**, 522–530.
- Mathews, C. E., Xue, S., Posgai, A., Lightfoot, Y. L., Li, X., Lin, A., Wasserfall, C., Haller, M. J., Schatz, D. and Atkinson, M. A.** (2015). Acute versus progressive onset of diabetes in NOD mice: Potential implications for therapeutic interventions in type 1 diabetes. *Diabetes* **64**, 3885–3890.
- Mohan, J. F., Kohler, R. H., Hill, J. A., Weissleder, R., Mathis, D. and Benoist, C.** (2017). Imaging the emergence and natural progression of spontaneous autoimmune diabetes. *Proc. Natl. Acad. Sci. U. S. A.* **114**, E7776–E7785.
- Okamoto, H., Cavino, K., Na, E., Krumm, E., Kim, S. Y., Cheng, X., Murphy, A. J., Yancopoulos, G. D. and Gromada, J.** (2017). Glucagon receptor inhibition normalizes blood glucose in severe insulin-resistant mice. *Proc. Natl. Acad. Sci. U. S. A.* **114**, 2753–2758.
- Paulsen, S. J., Vrang, N., Larsen, L. K., Larsen, P. J. and Jelsing, J.** (2010). Stereological assessment of pancreatic beta-cell mass development in male Zucker Diabetic Fatty (ZDF) rats: Correlation with pancreatic beta-cell function. *J. Anat.*

- Pearson, J. A., Wong, F. S. and Wen, L.** (2016). The importance of the Non Obese Diabetic (NOD) mouse model in autoimmune diabetes. *J. Autoimmun.* **66**, 76–88.
- Reed, J. C. and Herold, K. C.** (2015). Thinking bedside at the bench: The NOD mouse model of T1DM. *Nat. Rev. Endocrinol.* **11**, 308–314.
- Renier, N., Wu, Z., Simon, D. J., Yang, J., Ariel, P. and Tessier-Lavigne, M.** (2014). IDISCO: A simple, rapid method to immunolabel large tissue samples for volume imaging. *Cell* **159**, 896–910.
- Renier, N., Adams, E. L., Kirst, C., Dulac, C., Osten, P. and Tessier-Lavigne, M.** (2016). Mapping of Brain Activity by Automated Volume Analysis of Immediate Early Genes. *Cell* **165**, 1789–1802.
- Ronneberger, O., Fischer, P. and Brox, T.** (2015). U-net: Convolutional networks for biomedical image segmentation. In *Lecture Notes in Computer Science (including subseries Lecture Notes in Artificial Intelligence and Lecture Notes in Bioinformatics)*, .
- Roscioni, S. S., Migliorini, A., Gegg, M. and Lickert, H.** (2016). Impact of islet architecture on  $\beta$ -cell heterogeneity, plasticity and function. *Nat. Rev. Endocrinol.*
- Saito, K., Takahashi, T., Yaginuma, N. and Iwama, N.** (1978). Islet Morphometry in the Diabetic Pancreas of Man. *Tohoku J. Exp. Med.*
- Sandor, A. M., Jacobelli, J. and Friedman, R. S.** (2019). Immune cell trafficking to the islets during type 1 diabetes. *Clin. Exp. Immunol.* **198**, 314–325.
- Schäffer, L., Brand, C. L., Hansen, B. F., Ribel, U., Shaw, A. C., Slaaby, R. and Sturis, J.** (2008). A novel high-affinity peptide antagonist to the insulin receptor. *Biochem. Biophys. Res. Commun.*
- Yi, P., Park, J. S. and Melton, D. A.** (2013). Betatrophin: A hormone that controls pancreatic  $\beta$  cell proliferation. *Cell*.
- Zhou, Q., Brown, J., Kanarek, A., Rajagopal, J. and Melton, D. A.** (2008). In vivo reprogramming of adult pancreatic exocrine cells to  $\beta$ -cells. *Nature*.

## Figures

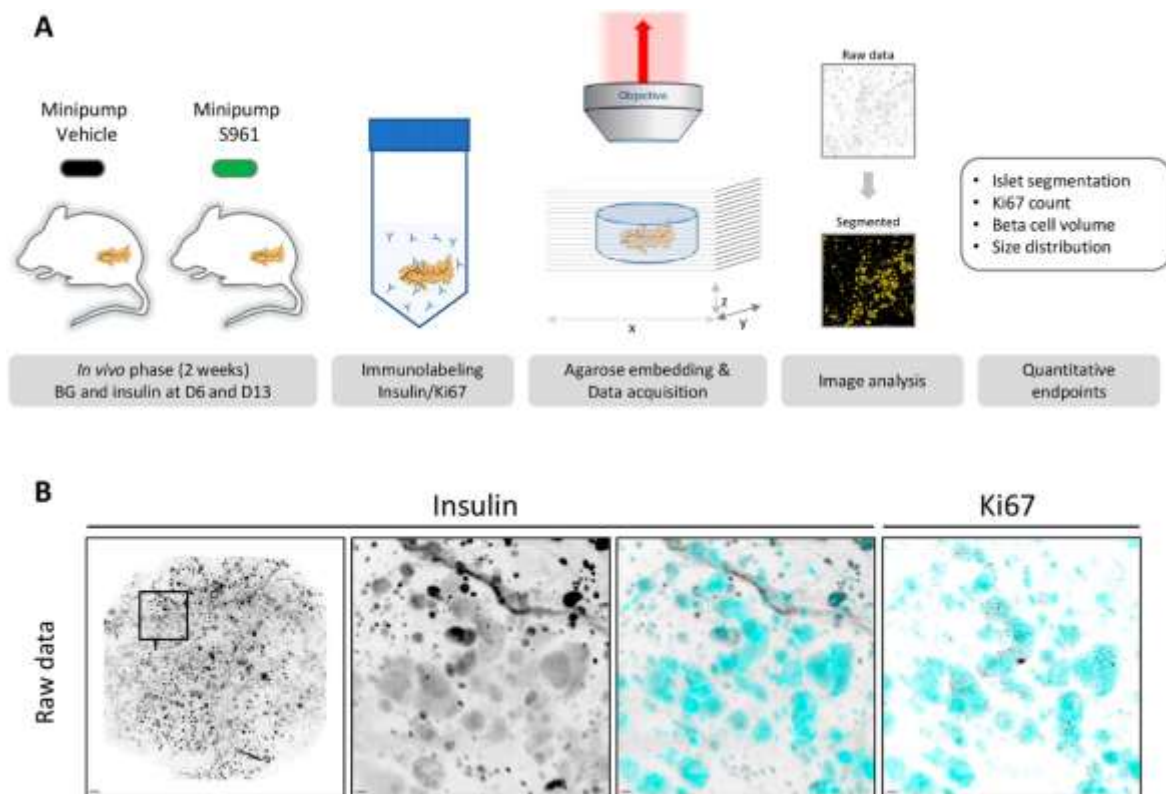

**Fig. 1 Schematic representation of the study workflow. A)** C57BL/6JRj DIO mice were implanted with minipumps containing either vehicle or the insulin receptor antagonist S961. Plasma glucose and insulin were measured at day 6 and day 13. After two weeks the pancreata were isolated and stained with antibodies against insulin and Ki67. For scanning the pancreas was embedded in agarose and cleared. The insulin channel was used as a reference to segment the beta cell volume allowing quantification of total number of insulin positive islets, total beta cell volume and total number of Ki67 positive beta cells. **B)** The entire pancreas was scanned using LSFM. The insulin channel was used to segment the beta cell volume (cyan) which is used for quantification of numbers and volumes. The Ki67 channel was used to count the number of proliferating beta cells.

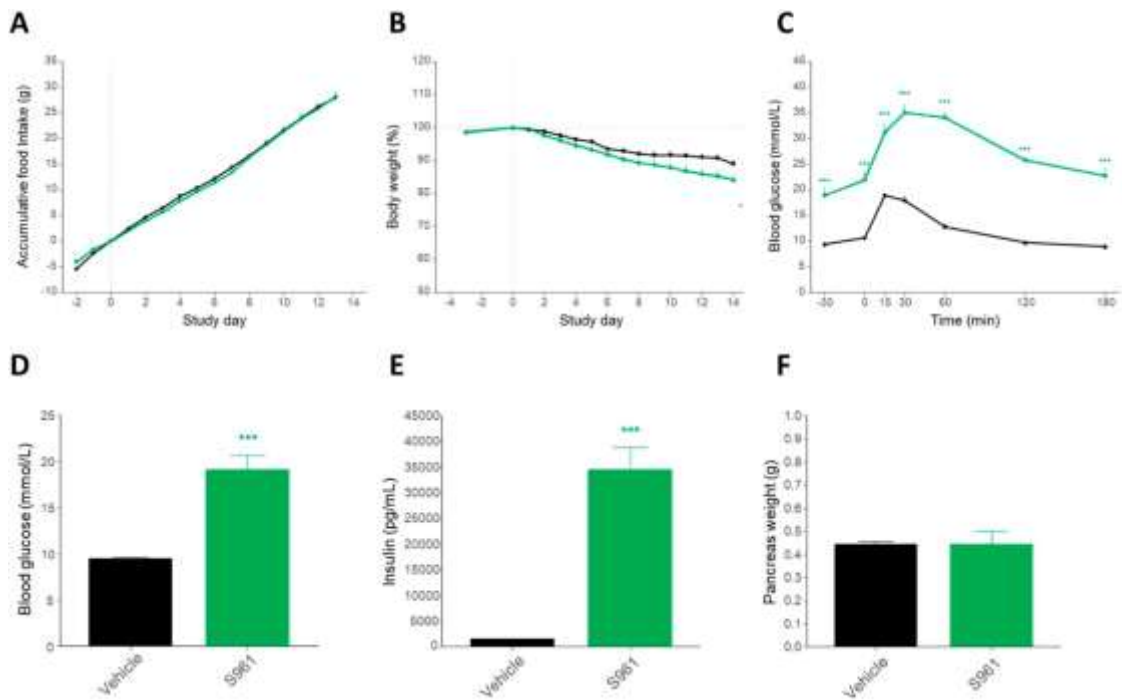

**Fig. 2 In vivo measurements in mice dosed with either vehicle or S961.** **A)** Accumulated food intake during the two-week study was similar in the two groups. **B)** The S961 mice lost slightly more weight compared to the vehicle group but was only significant at day 14. **C)** Following OGGT there was significantly increased blood glucose in the S961 group compared to vehicle. **D)** At day 13 the mean plasma glucose levels were  $9.50 \pm 0.22$  (mmol/L) in the vehicle group and  $20.02 \pm 1.48$  (mmol/L) in the S961 dosed group. **E)** The mean plasma insulin levels were  $1450 \pm 96.1$  (pg/mL) in the vehicle group and  $34400 \pm 884$  (pg/mL) in the S961 group. **F)** No differences between the two groups in total pancreas weight. For statistical analysis we used unpaired t-tests, \*\*\*:  $P < 0.001$  S961 compared to Vehicle. Error bars are expressed as SEM.

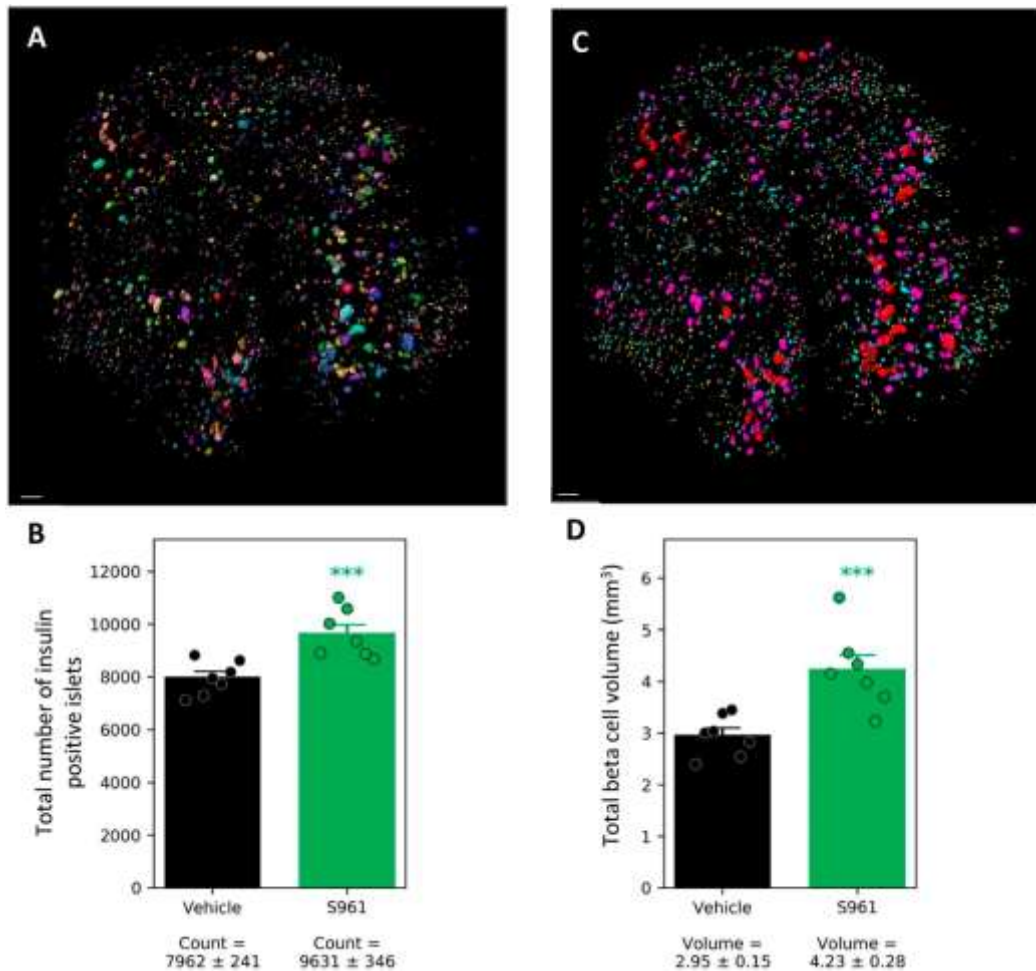

**Fig. 3 Increased beta cell volume and number of insulin positive islets following S961 dosing.** **A)** Using the insulin signal each islet was assigned with a unique ID and a volume, making it possible to calculate the total number of insulin positive islets and the total beta cell volume. **B)** The mean number of insulin positive islets in vehicle and S961 treated mice. **C)** The mean beta cell volume in the vehicle group is  $2.50\text{mm}^3 \pm 0.13$  and  $3.62\text{mm}^3 \pm 0.25$  in the S961 group. **D)** The same pancreas as shown in A, colour coded for size distribution. The insulin positive islets were allocated into four bins, small (yellow;  $25\text{-}170 \times 1000\mu\text{m}^3$ ), medium (cyan;  $170\text{-}1100 \times 1000\mu\text{m}^3$ ), large; (magenta;  $1100\text{-}7500 \times 1000\mu\text{m}^3$ ) and very large (red;  $7500\text{-}50000 \times 1000\mu\text{m}^3$ ). **D)** Graph showing total mean beta cell volume in the study groups. For statistical analysis we used unpaired t-test \*\*\*:  $P < 0.001$  S961 compared to Vehicle. Error bars are expressed as SEM. Scale bars:  $500\mu\text{m}$ .

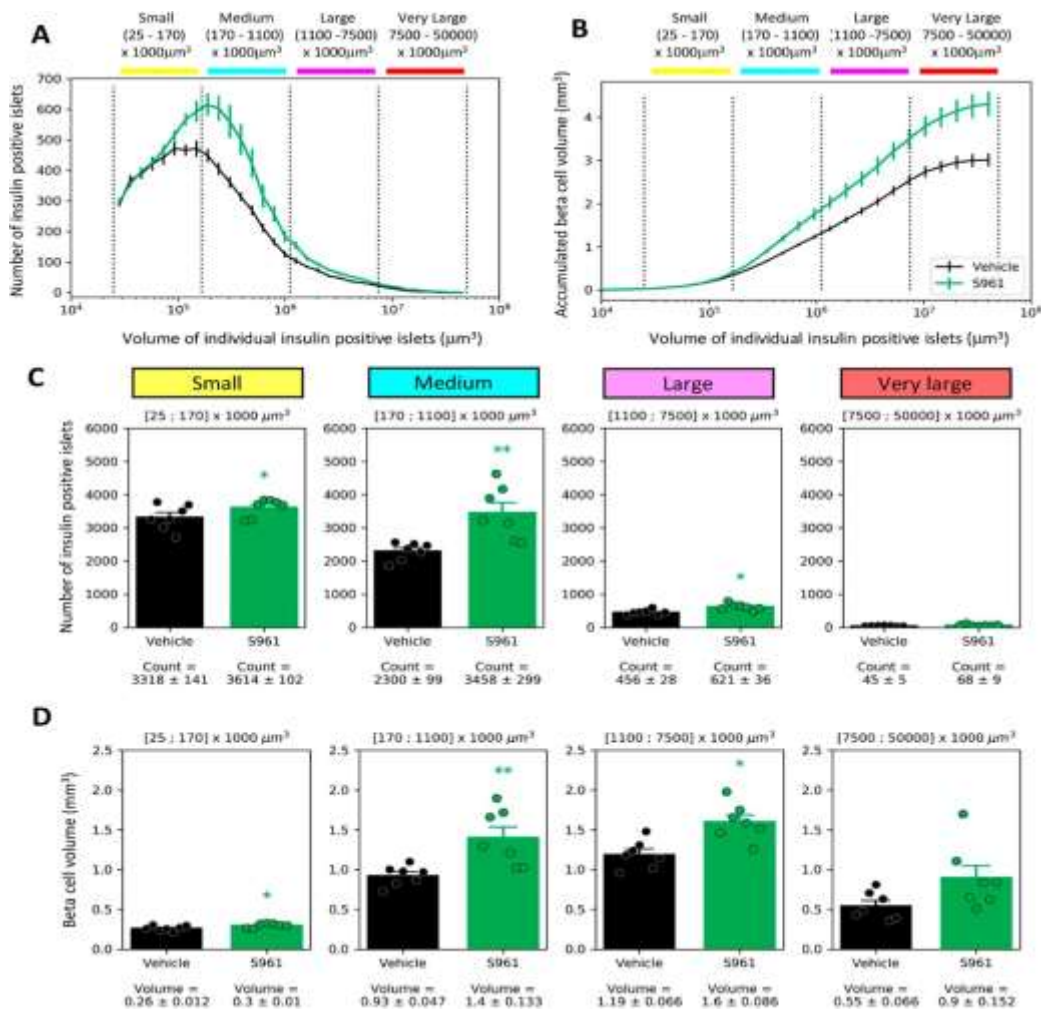

**Figure 4. S961 dosing response in different islet size categories:** **A)** Size distribution curve of islets. Size categories as indicated in the legend of Figure 3. **B)** Relative contribution of islets in different size categories to the total islet volume. Islets across all size categories contribute to the overall increase in total beta cell volume. **C)** Quantification of the number of small (yellow), medium (cyan), large (magenta) and very large (red) insulin positive islets in vehicle and S961 dosed mice. In all four bins there is an increase in the number of insulin positive islets following S961 dosing. **D)** Quantification of the beta cell volume in the small-sized (yellow), medium-sized (cyan), large (magenta) and very large (red) islets in vehicle and S961 dosed mice.

**C+D)** Both sets of data were separately investigated using 2x4 mixed ANOVA and in follow-up tests on the treatment effect within each size category, the two measures were investigated in a multivariate manner (due to correlation) by Hotellings T-squared test \*:  $P < 0.05$ , \*\*:  $P < 0.01$ ; S961 compared to Vehicle. Error bars are expressed as SEM.



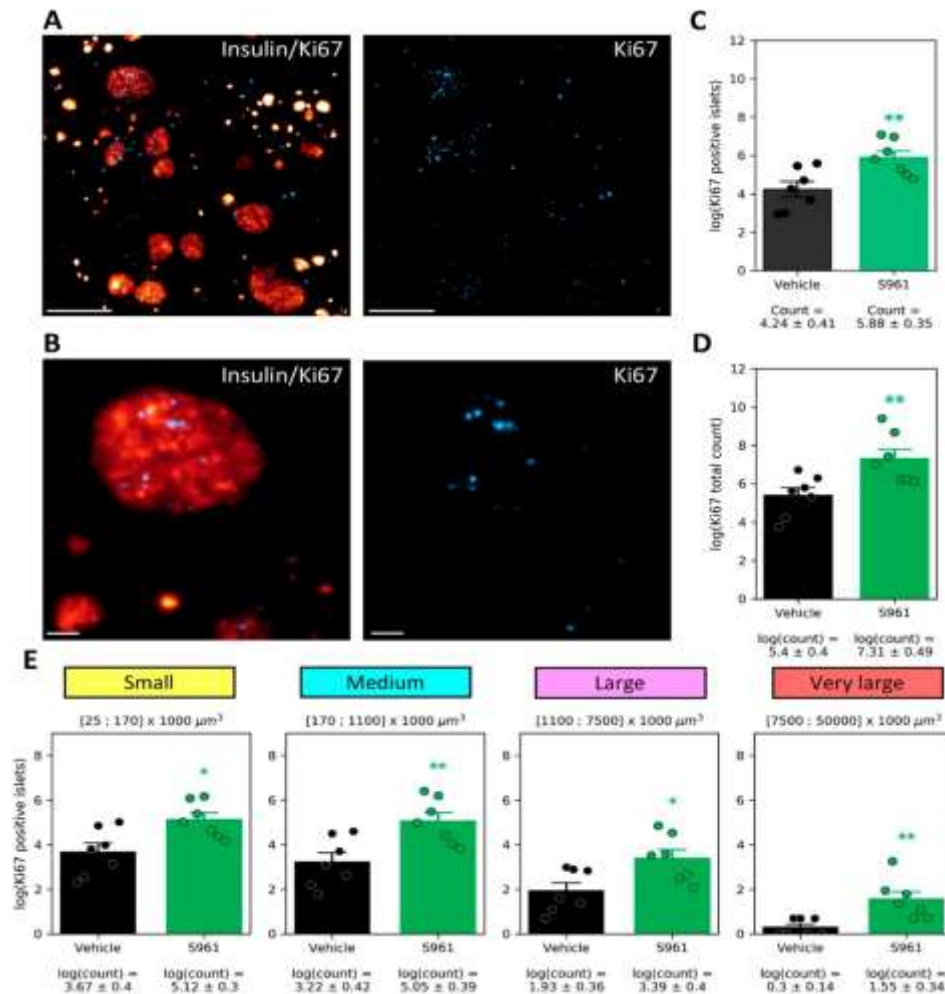

**Figure 5. Quantification of Ki67 positive beta cells:** **A)** 3D light sheet microscopy image from a S961 dosed mouse showing the insulin (glow scale) and Ki-67 staining (blue). Ki-67 channel is shown separately on the right. **B)** High magnification section ( $20 \mu\text{m}$ ) from 3D image stack, showing insulin and Ki-67 staining in an islet. **C)** Total number of Ki-67 positive islets is increased in S961 group in comparison to the vehicle group. **D)** Total number of Ki-67 positive cells within all segmented islets is increased in S961 group in comparison to the vehicle group. **E)** Quantification of the number of small (yellow), medium (cyan), large (magenta) and very large (red) insulin positive islets with Ki-67 signal in vehicle and S961 dosed mice. Individual data points are indicated as spheres. For pairwise statistical analysis (in C, D and E) we used unpaired t-test, and in E ; \*:  $P < 0.05$ , \*\*:  $P < 0.01 = 0.0022$  for S961 compared to Vehicle. Specifically, for E, mixed ANOVA was applied prior to the pairwise statistics. Error bars are expressed as SEM. Scale bars: A,  $400 \mu\text{m}$ ; B,  $100 \mu\text{m}$ .

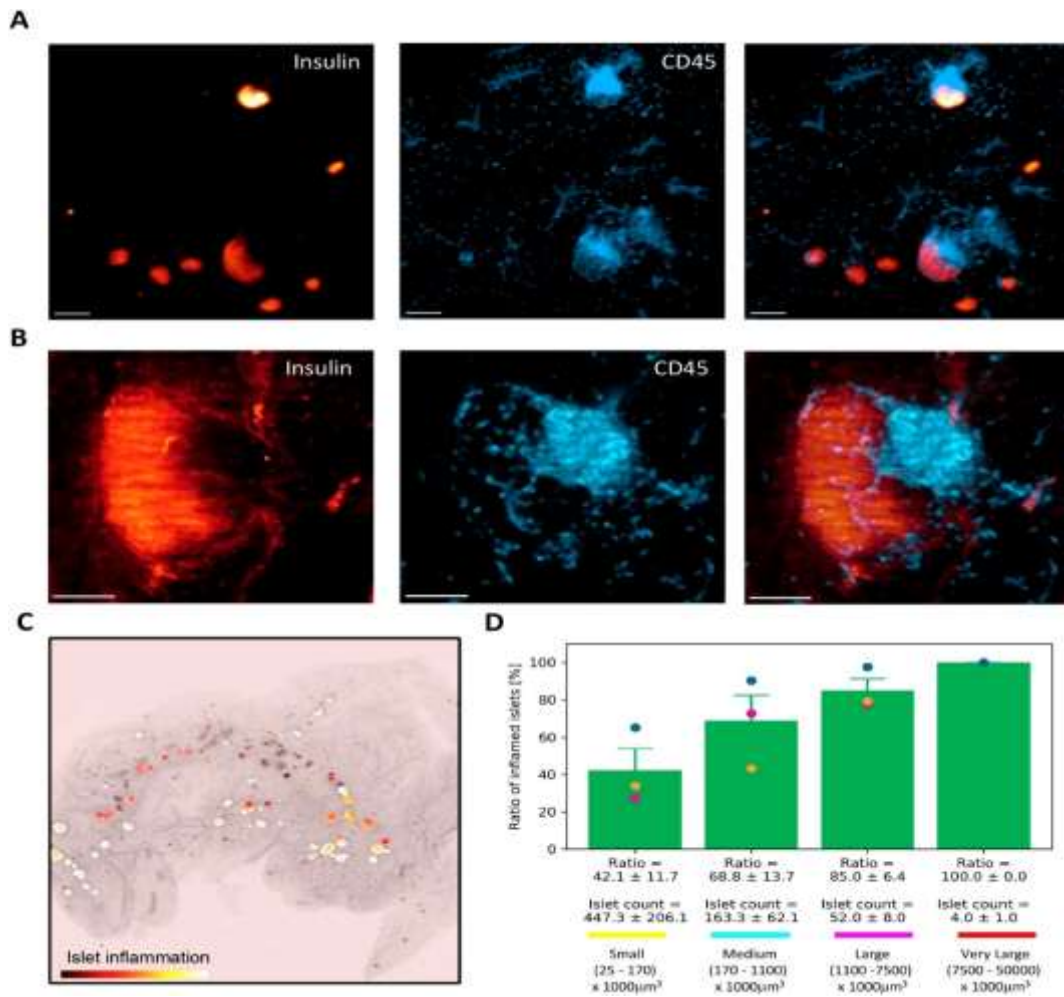

**Figure 6. 3D imaging of islet inflammation in NOD mice:** **A)** 3D light sheet microscopy image of an area in 14-week-old NOD mouse pancreas, stained for insulin (glow scale) and CD45 (blue). Section from 3D image stack, demonstrating insulin signal (glow scale) and CD45 staining (blue) in 14-week-old NOD mouse. **B)** High magnification image of an individual islet from NOD mouse, demonstrating insulin signal (glow scale) and leukocyte (CD45, blue) infiltration within the islet and accumulation at islet periphery. **C)** Overview image of pancreas head, with islet inflammation segmentation data in glow scale overlaid with islet insulin segmentation data. Higher prevalence of CD45+ cells within an islet results in brighter islet colour. **D)** Quantification of the number of inflamed small (yellow), medium (cyan), large (magenta) and very large (red) insulin positive islets. Islets with at least 5% volume of CD45+ cells were quantified. Individual data points are indicated as spheres. Error bars are expressed as SEM. Scale bar: A, 200 µm; B, 100 µm.
